# Supplementary material
Source: publisher site journal article supplement (https://static.cambridge.org/content/id/urn:cambridge.org:id:article:S1352465820000752/resource/name/S1352465820000752supp003.docx)
Supplement: Supplementary file 1 [file S1352465820000752supp003.docx]

**Appendix C: Websites used by participants in the free search condition**

| *n* | Websites visited |
| --- | --- |
| 1 | [Www.healthprep.com](http://Www.healthprep.com)  [Www.inform.scot](http://Www.inform.scot)  [Www.m.webmd.boots.com](http://Www.m.webmd.boots.com)  [Www.nidirect.gov.uk](http://Www.nidirect.gov.uk)  [Www.nhs.uk](http://Www.nhs.uk) |
| 2 | [Www.mumsnet.com](http://Www.mumsnet.com)  [Www.onhealth.com](http://Www.onhealth.com)  [Www.sheknows.com](http://Www.sheknows.com)  [Www.raisingchildren.net.au](http://Www.raisingchildren.net.au)  [Www.teenhelp.org](http://Www.teenhelp.org) |
| 3 | <https://www.cedars-sinai.edu/Patients/Programs-and-Services/Pancreatic-and-Biliary-Diseases/Treatment/Unexplained-Abdominal-Pain.aspx>  <https://www.healthline.com/symptom/abdominal-pain>  <https://www.nhs.uk/conditions/medically-unexplained-symptoms/>  <http://www.med.umich.edu/yourchild/topics/abpain.htm>  <https://patient.info/doctor/recurrent-abdominal-pain-in-children-pro> |
| 4 | <https://www.nhsinform.scot/illnesses-and-conditions/stomach-liver-and-gastrointestinal-tract/stomach-ache-and-abdominal-pain>  <https://www.nhsinform.scot/illnesses-and-conditions/stomach-liver-and-gastrointestinal-tract/appendicitis>  <https://www.emedicinehealth.com/abdominal_pain_in_adults/article_em.htm>  <https://www.bmj.com/content/359/bmj.j5122>  <https://www.ncbi.nlm.nih.gov/pmc/articles/PMC4029240/> |
| 5 | <https://www.nhs.uk/conditions/stomach-ache/>  <https://www.womansday.com/health-fitness/g2380/signs-stomach-pain-isnt-normal/>  <http://www.ourhealth.com/conditions/i-cannot-get-a-diagnosis/severe-upper-abdominal-pain-had-every-test-possiblehttps://www.betterhealth.vic.gov.au/health/conditionsandtreatments/abdominal-pain-in-children>  <https://www.google.co.uk/amp/s/www.womansday.com/health-fitness/gmp2380/signs-stomach-pain-isnt-normal/>  <https://www.doctorslounge.com/gastroenterology/forums/backup/topic-13843.html>  <https://www.quora.com/What-can-cause-sharp-needle-like-pain-in-stomach?utm_medium=organic&utm_source=google_rich_qa&utm_campaign=google_rich_qa>  <https://www.emedicinehealth.com/abdominal_pain_in_adults/article_em.htm>  <https://www.mumsnet.com/Talk/childrens_health/1791239-Severe-abdominal-pain-in-my-12-year-old-daughter>  <https://medlineplus.gov/ency/article/007504.htm> |
| 6 | <https://www.healthlinkbc.ca/health-topics/abpn10>  <https://medlineplus.gov/ency/article/007504.htm>  <https://www.betterhealth.vic.gov.au/health/conditionsandtreatments/abdominal-pain-in-children>  <https://www.mayoclinic.org/symptom-checker/abdominal-pain-child/related-factors/itt-20009075> |
| 7 | <https://www.todaysparent.com/toddler/my-tummy-hurts/>  <https://patient.info/health/recurrent-abdominal-pain-in-children-leaflet>  <https://www.livestrong.com/article/539662-kids-who-have-stomach-pains-in-the-morning/>  <http://www.cyh.com/HealthTopics/HealthTopicDetails.aspx?p=114&np=301&id=1481>  <https://www.wikihow.com/Cure-a-Child%27s-Stomach-Ache>  <https://www.webmd.boots.com/children/baby/guide/recognising-symptoms-children-painhttps://medlineplus.gov/ency/article/007504.htm> |
| 8 | Google  NHS, Wellbeing service locally  Local youth counselling services  Pastoral support team at school  Get self-help  Centre for clinical interventions workbooks |
| 9 | <https://www.nhs.uk/Search/?q=stomach+pain>  <https://www.nhsinform.scot/illnesses-and-conditions/stomach-liver-and-gastrointestinal-tract/stomach-ache-and-abdominal-pain>  <https://www.nhsinform.scot/illnesses-and-conditions/stomach-liver-and-gastrointestinal-tract/appendicitis>  <https://www.todaysparent.com/toddler/my-tummy-hurts/> |
| 10 | <https://www.reuters.com/article/us-aches-teens-idUSHO46643720071224>  <https://www.uptodate.com/contents/chronic-abdominal-pain-in-children-and-adolescents-beyond-the-basics>  <https://www.bmj.com/content/359/bmj.j5122>  <http://pedsinreview.aappublications.org/content/4/9/281>  <https://www.nhsinform.scot/illnesses-and-conditions/stomach-liver-and-gastrointestinal-tract/stomach-ache-and-abdominal-pain>  <https://www.msdmanuals.com/en-gb/home/digestive-disorders/symptoms-of-digestive-disorders/chronic-and-recurring-abdominal-pain>  <http://www.health.com/health/gallery/0,,20568290,00.html>  <https://www.express.co.uk/life-style/health/640335/stomach-pains-health-issues-what-your-stomach-is-telling-you-bloating-cramps-diarrhoea>  <https://www.express.co.uk/life-style/health/933987/bloating-stomach-pain-causes-prevent-constipation-ibs>  <https://www.womansday.com/health-fitness/g2380/signs-stomach-pain-isnt-normal/>  <https://www.webmd.com/pain-management/guide/abdominal-pain-causes-treatments#1>  <http://www.starjournalnow.com/2016/06/13/whats-causing-the-pain-in-your-abdomen/>  <https://www.ibstales.com/constipation-tales-ten.htm>  <https://www.emedicinehealth.com/abdominal_pain_in_adults/viewer-comments_em-250.htm>  <https://forums.anandtech.com/threads/just-woke-up-with-the-worst-stomach-pains-of-my-life.1789863/>  <http://www.ibsgroup.org/forums/topic/88809-knifelike-stabbing-painwith-burning/>  <https://www.doctorslounge.com/gastroenterology/forums/backup/topic-13843.html>  <https://www.medicinenet.com/abdominal_pain/symptoms.htm>  <https://www.nhs.uk/conditions/stomach-ache/>  <https://www.express.co.uk/life-style/health/621967/Stomach-pain-signs-symptoms-health>  <https://www.webmd.com/pain-management/guide/abdominal-pain-causes-treatments#1>  <https://www.medicinenet.com/abdominal_pain/symptoms.htm>  <https://www.ncbi.nlm.nih.gov/pmc/articles/PMC1868349/>  <https://health.clevelandclinic.org/stomach-aches-5-things-parents-should-know/>  <https://www.pedscases.com/node/173/take>  <https://www.emedicinehealth.com/abdominal_pain_in_children/article_em.htm>  <https://www.cigna.com/healthwellness/hw/medical-topics/abdominal-pain-age-12-and-older-abdpn> |
| 11 | <https://www.webmd.com/pain-management/guide/abdominal-pain-causes-treatments>  <http://www.momjunction.com/articles/abdominal-pain-in-teenagers_00400018/#gref>  <http://raisingchildren.net.au/articles/stomache_ache.html>  <https://www.mumsnet.com/Talk/childrens_health/1791239-Severe-abdominal-pain-in-my-12-year-old-daughter> |
| 12 | <https://www.nhs.uk/conditions/stomach-ache/>  <https://www.webmd.boots.com/digestive-disorders/abdominal-pain>  <http://www.ibsgroup.org/forums/topic/88809-knifelike-stabbing-painwith-burning/> |
| 13 | <http://stomachbloating.net/stomach-gas-pain-at-night-causes-and-treatment/>  <https://www.betterhealth.vic.gov.au/health/conditionsandtreatments/abdominal-pain-in-children>  <https://www.webmd.boots.com/digestive-disorders/abdominal-pain>  <https://what0-18.nhs.uk/application/files/5415/1273/2637/CS45385_NHS_Abdo_Pain_Pathway_Management_-_Acute_Setting_Nov_17.pdf>  <https://www.healthline.com/health/digestive-health/stomach-pain-at-night#causes>  <https://symptomchecker.webmd.com/multiple-symptoms?symptoms=difficulty-sleeping%7Cnausea-or-vomiting%7Cpain-or-discomfort%7Cupset-stomach&symptomids=79%7C156%7C1%7C335&locations=2%7C22%7C22%7C22>  <https://www.nhs.uk/livewell/childrenssleep/pages/teensleeptips.aspx>  <http://raisingchildren.net.au/articles/sleep_early_teens.html/context/1069> |
| 14 | <http://emj.bmj.com/content/21/5/606>  <https://www.womenshealthmag.com/health/a19971912/sharp-stomach-pain/>  <http://www.momjunction.com/articles/abdominal-pain-in-teenagers_00400018/#gref>  <https://reference.medscape.com/features/slideshow/acute-abdominal-pain>  <http://pedsinreview.aappublications.org/content/4/9/281> |
| 15 | <https://www.womansday.com/health-fitness/g2380/signs-stomach-pain-isnt-normal/>  <https://www.cigna.com/healthwellness/hw/medical-topics/abdominal-pain-age-11-and-younger-abpn10>  <https://www.ncbi.nlm.nih.gov/pmc/articles/PMC3088003/>  <https://www.mumsnet.com/Talk/childrens_health/1791239-Severe-abdominal-pain-in-my-12-year-old-daughter>  <https://patient.info/doctor/acute-abdominal-pain-in-children> |
| 16 | <https://www.medhelp.org/posts/Gastroenterology/Teenager-with-constant-stomach-pain-3-months-/show/941630>  <https://www.healthtap.com/topics/feels-like-a-knife-in-my-stomach>  <http://pediatrics.aappublications.org/content/115/3/812>  <http://www.momjunction.com/articles/abdominal-pain-in-teenagers_00400018/#gref> |
| 17 | <https://www.healthline.com/symptom/abdominal-pain>  <http://crystalclearcounselling.co.uk/counselling-for-teenagers-and-young-people-in-cromer-norfolk-and-norwich/>  <http://crystalclearcounselling.co.uk/counselling-for-teenagers-and-young-people-in-cromer-norfolk-and-norwich/>  <https://www.nhsinform.scot/illnesses-and-conditions/stomach-liver-and-gastrointestinal-tract/stomach-ache-and-abdominal-pain>  <https://www.nhs.uk/conditions/stomach-ache/> |
| 18 | <https://www.womansday.com/health-fitness/g2380/signs-stomach-pain-isnt-normal/>  <https://www.thesun.co.uk/archives/news/273261/what-do-these-8-different-types-of-stomach-pain-really-mean/>  <http://www.med-help.net/mc-severe-abdominal-pain.html>  <https://www.healthboards.com/boards/irritable-bowel-syndrome-ibs/783473-ibs-chronic-sharp-shooting-knife-like-pain.html>  <https://www.nhs.uk/conditions/chronic-pancreatitis/>  <https://www.emedicinehealth.com/abdominal_pain_in_adults/article_em.htm>  <https://www.gponline.com/red-flag-symptoms-epigastric-pain/gi-dyspepsia/gord/article/1022221>  <https://www.healthhype.com/acute-severe-abdominal-stomach-pain.html>  <https://www.epainassist.com/pain-management/what-is-stabbing-pain>  <https://www.livestrong.com/article/249031-causes-of-a-sudden-sharp-pain-in-the-lower-left-abdomen/>  <http://www.momjunction.com/articles/abdominal-pain-in-teenagers_00400018/#gref>  <https://www.cigna.com/healthwellness/hw/medical-topics/abdominal-pain-age-11-and-younger-abpn10>  <https://www.uptodate.com/contents/chronic-abdominal-pain-in-children-and-adolescents-beyond-the-basics>  <https://healthand.com/au/topic/general-report/abdominal-pain-in-children>  <https://www.msdmanuals.com/home/digestive-disorders/symptoms-of-digestive-disorders/acute-abdominal-pain>  <http://www.dailymail.co.uk/health/article-2276200/Understand-gut-reaction-Stomach-pain-innocent--watch-signs-major-illness.html>  <https://www.ncbi.nlm.nih.gov/pubmed/8829002> <https://login.medscape.com/login/sso/getlogin?urlCache=aHR0cHM6Ly9yZWZlcmVuY2UubWVkc2NhcGUuY29tL2ZlYXR1cmVzL3NsaWRlc2hvdy9hY3V0ZS1hYmRvbWluYWwtcGFpbg==&ac=401>  <http://www.sheknows.com/parenting/articles/992727/what-causes-teen-digestive-problems>  <http://www.kroegerhealer.com/what-causes-unexplained-abdominal-pain-in-children.htm>  <https://patient.info/doctor/recurrent-abdominal-pain-in-children-pro>  <http://www.dailymail.co.uk/health/article-2335192/Teenager-19-visited-doctors-FIVE-times-stomach-pain-diagnosed-IBS--just-weeks-later-died-bowel-cancer.html>  <http://raisingchildren.net.au/articles/stomache_ache.html>  <https://www.consumeraffairs.com/news04/2010/10/kids-with-unexplained-stomach-pain-may-have-fructose-intolerance.html> |
| 19 | <https://www.google.co.uk/amp/s/www.womansday.com/health-fitness/gmp2380/signs-stomach-pain-isnt-normal/>  <https://www.healthlinkbc.ca>  <https://medlineplus.gov/ency/article/007504.htm>  <https://www.betterhealth.vic.gov.au/health/conditionsandtreatments/abdominal-pain-in-adults>  <https://www.webmd.com/pain-management/guide/abdominal-pain-causes-treatments>  <https://www.healthline.com/health/digestive-health/stomach-pain-at-night>  <https://healthand.com/au/topic/general-report/abdominal-pain-in-children>  <https://www.msdmanuals.com/home/digestive-disorders/symptoms-of-digestive-disorders/acute-abdominal-pain> |
| 20 | <https://www.womansday.com/health-fitness/g2380/signs-stomach-pain-isnt-normal/>  <https://www.ncbi.nlm.nih.gov/pmc/articles/PMC1868349/>  <https://www.mumsnet.com/Talk/childrens_health/1791239-Severe-abdominal-pain-in-my-12-year-old-daughter>  <https://www.today.com/health/10-tummy-troubles-you-should-never-ignore-t74171>  <https://www.buoyhealth.com/current/stomach-pain-symptoms-and-diagnosis/> |
| 21 | <https://www.healthline.com/health/digestive-health/stomach-pain-at-night>  <https://www.google.co.uk/amp/s/www.doctorshealthpress.com/pain-articles/stomach-pain-at-night-causes-treatments/amp/>  <https://www.emedicinehealth.com/abdominal_pain_in_children/article_em.htm>  <https://www.nhs.uk/conditions/stomach-ache/>  <https://www.nhs.uk/conditions/stomach-ache/#less-common-causes>  <http://www.cyh.com/HealthTopics/HealthTopicDetails.aspx?p=114&np=301&id=1481>  <https://kidshealth.org/en/teens/stomachaches.html> |
| 22 | <https://www.webmd.com/pain-management/guide/abdominal-pain-causes-treatments#1>  <https://www.nhs.uk/conditions/stomach-ache/>  <https://www.nhsinform.scot/illnesses-and-conditions/stomach-liver-and-gastrointestinal-tract/stomach-ache-and-abdominal-pain>  <https://patient.info/health/abdominal-pain-leaflet> |
| 23 | <https://www.cedars-sinai.edu/Patients/Programs-and-Services/Pancreatic-and-Biliary-Diseases/Treatment/Unexplained-Abdominal-Pain.aspx>  <https://www.webmd.com/sleep-disorders/news/20041215/cant-sleep-could-be-digestive-problem>  <https://www.todaysparent.com/toddler/my-tummy-hurts/>  <https://www.webmd.com/children/recognizing-symptoms-children-pain#1>  <https://www.healthline.com/health/digestive-health/stomach-pain-at-night> |
| 24 | <https://www.consumeraffairs.com/news04/2010/10/kids-with-unexplained-stomach-pain-may-have-fructose-intolerance.html>  <https://www.bmj.com/content/359/bmj.j5122>  <https://www.sciencedirect.com/science/article/pii/S1522840114000573>  <https://www.livestrong.com/article/497306-stomach-discomfort-at-night/>  <https://www.steadyhealth.com/topics/abdominal-pain-only-at-night> |
| 25 | <https://www.google.co.uk/amp/s/www.womansday.com/health-fitness/gmp2380/signs-stomach-pain-isnt-normal/>  <https://rosemed.com/service/go-to-the-er-abdominal-pain>  <https://www.google.co.uk/amp/www.momjunction.com/articles/abdominal-pain-in-teenagers_00400018/%3famp=1>  <https://reference.medscape.com/features/slideshow/acute-abdominal-pain> |
| 26 | <https://www.healthychildren.org/English/health-issues/conditions/abdominal/Pages/Appendicitis-in-Teens.aspx>  <https://www.medhelp.org/posts/Gastroenterology/15-Year-Old-Girl-With-Severe-Stomach-Pain/show/1441567>  <https://www.ncbi.nlm.nih.gov/pubmed/8829002>  NHS acute stomach pain  <https://patient.info/doctor/acute-abdominal-pain-in-children> |
| 27 | Relevance of cognitive and behavioural factors in medically unexplained syndromes and somatoform disorders  <http://https://www.doctorslounge.com/gastroenterology/forums/backup/topic-13843.html>  <https://www.zocdoc.com/answers/12313/what-could-cause-a-stabbing-pain-in-my-stomach>  <https://www.medhelp.org/posts/Digestive-Disorders---Gastroenterology/SHARP-PAINS-IN-THE-STOMACH--SHORT-LIKE-KNIFE-STABBING-ME/show/233910http://www.itzarion.com/pain-symptoms-chart.htmhttp://www.med-help.net/mc-severe-abdominal-pain.htmllhttps://familydoctor.org/symptom/abdominal-pain-stomach-pain-short-term/>  <http://www.med-help.net/mc-severe-abdominal-pain.html> |
| 28 | <https://www.webmd.com/pain-management/guide/abdominal-pain-causes-treatments#1>  <https://www.betterhealth.vic.gov.au/health/conditionsandtreatments/abdominal-pain-in-adults>  <https://www.womansday.com/health-fitness/g2380/signs-stomach-pain-isnt-normal/>  <https://www.mayoclinic.org/symptom-checker/abdominal-pain-adult/related-factors/itt-20009075>  <https://www.webmd.boots.com/digestive-disorders/abdominal-pain>  <https://www.today.com/health/10-tummy-troubles-you-should-never-ignore-t74171> |
| 29 | <https://www.webmd.com/sleep-disorders/news/20041215/cant-sleep-could-be-digestive-problem>  <https://www.nhsinform.scot/illnesses-and-conditions/stomach-liver-and-gastrointestinal-tract/stomach-ache-and-abdominal-pain>  <https://m.huffpost.com/us/entry/3536674>  <https://patient.info/health/abdominal-pain-leaflet> |
| 30 | [Www.healthline.com](http://Www.healthline.com)  [Www.nhs.uk](http://Www.nhs.uk)  [Www.webmd.com](http://Www.webmd.com) |
| 31 | <https://sleepfoundation.org/insomnia/content/what-do-when-you-cant-sleep>  <https://www.msdmanuals.com/en-gb/home/digestive-disorders/symptoms-of-digestive-disorders/chronic-and-recurring-abdominal-pain>  <https://www.nhs.uk/live-well/sleep-and-tiredness/how-to-get-to-sleep/> |
| 32 | <https://www.rcpsych.ac.uk/healthadvice/parentsandyouthinfo/parentscarers/medicallyunexplainedsymptoms.aspx?theme=mobile>  <http://ep.bmj.com/content/101/3/114>  <https://www.mumsnet.com/Talk/childrens_health/1791239-Severe-abdominal-pain-in-my-12-year-old-daughter>  <http://www.ourhealth.com/conditions/i-cannot-get-a-diagnosis/16-year-old-with-severe-stomach-pain-at-belly-button>  <https://www.mentalhealth.org.uk/a-to-z/s/stress>  [www.betterhealth.vic.gov.au/health/conditionsandtreatments/abdominal-pain-in-adults](http://www.betterhealth.vic.gov.au/health/conditionsandtreatments/abdominal-pain-in-adults)  <https://www.nhs.uk/livewell/pain/pages/20-painful-conditions.aspx>  <https://www.nhs.uk/conditions/fibromyalgia/symptoms/> |
| 33 | <https://www.womansday.com/health-fitness/g2380/signs-stomach-pain-isnt-normal/>  <https://www.thesun.co.uk/archives/news/273261/what-do-these-8-different-types-of-stomach-pain-really-mean/>  <https://www.zocdoc.com/answers/12313/what-could-cause-a-stabbing-pain-in-my-stomach>  <http://www.ibsgroup.org/forums/topic/88809-knifelike-stabbing-painwith-burning/>  <http://www.med-help.net/mc-severe-abdominal-pain.html>  <https://www.livestrong.com/article/249031-causes-of-a-sudden-sharp-pain-in-the-lower-left-abdomen/> |
| 34 | [Www.nhs.uk](http://Www.nhs.uk)  [Www.cigna.com](http://Www.cigna.com)  [Www.medicalnewstoday.com](http://Www.medicalnewstoday.com)  [Www.healthline.com](http://Www.healthline.com) |
| 35 | Abdominal migraines  webmd.boots.com  medical news today.com  [www.healthline.com/health/gigestive-health/stomach-pain-at-night](http://www.healthline.com/health/gigestive-health/stomach-pain-at-night)  [www.nhs.uk/conditions/stomach-ache raising children.net.au](http://www.nhs.uk/conditions/stomach-ache%20raising%20children.net.au)  [www.kidshealth.org/en/teens/stomachaches.html](http://www.kidshealth.org/en/teens/stomachaches.html)  [www.calmclinic.com/anxiety/symptoms/stomach-pain](http://www.calmclinic.com/anxiety/symptoms/stomach-pain) |
| 36 | <https://www.zocdoc.com/answers/12313/what-could-cause-a-stabbing-pain-in-my-stomach>  <https://www.womansday.com/health-fitness/g2380/signs-stomach-pain-isnt-normal/>  <https://www.healthboards.com/boards/bowel-disorders/180746-sharp-stabbing-pains-abdomen.html>  <https://www.webmd.com/pain-management/guide/abdominal-pain-causes-treatments>  <http://m.raisingchildren.net.au/articles/stomache_ache.html>  <https://www.google.co.uk/amp/www.momjunction.com/articles/abdominal-pain-in-teenagers_00400018/%3famp=1>  <http://kidshealth.org/en/kids/abdominal-pain.html>  <https://www.betterhealth.vic.gov.au/health/conditionsandtreatments/abdominal-pain-in-adults>  <https://www.google.co.uk/amp/s/healthhearty.com/stabbing-pain-in-stomach.amp> |
| 37 | <https://www.nhsinform.scot/illnesses-and-conditions/stomach-liver-and-gastrointestinal-tract/stomach-ache-and-abdominal-pain>  <https://www.webmd.com/pain-management/guide/abdominal-pain-causes-treatments>  <https://patient.info/health/abdominal-pain-leaflet>  <https://www.healthline.com/health/digestive-health/stomach-pain-at-night#suddenonset-conditions>  <https://kidshealth.org/en/kids/abdominal-pain.html>  <https://kidshealth.org/en/teens/stomachaches.html>  <https://www.medicinenet.com/abdominal_pain_causes/views.htm> |
